# Supplementary material for: Apigenin inhibits renal cell carcinoma cell proliferation
Source: PubMed Central journal article supplement (PMC5386726; doi:10.18632/oncotarget.15771), 2017-02-28
Supplement: oncotarget-08-19834-s001.pdf [file oncotarget-08-19834-s001.pdf]

## Apigenin inhibits renal cell carcinoma cell proliferation

### Supplementary Materials

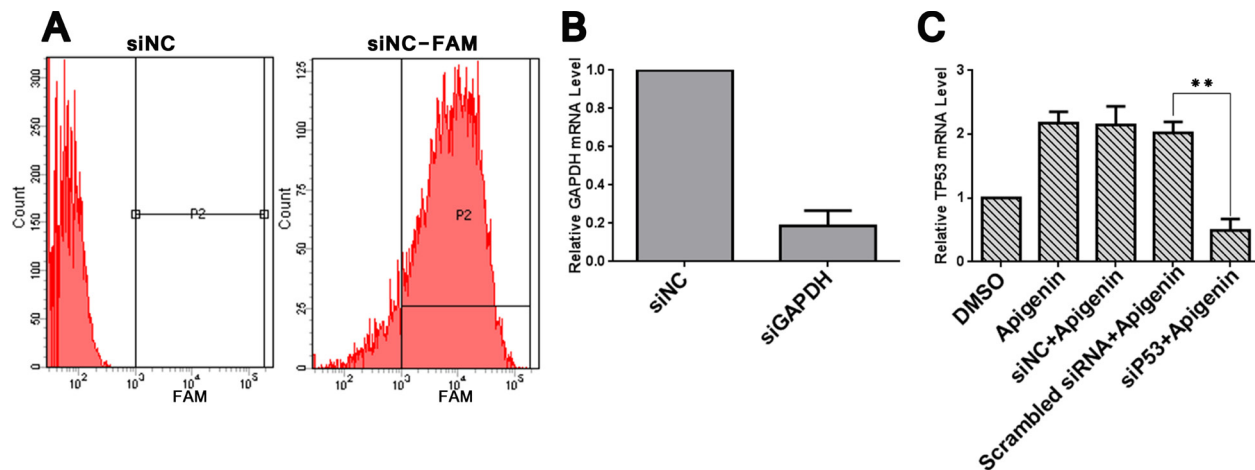

**Supplemental Figure 1: siRNA transfection efficiency and p53 mRNA level in ACHN cells.** Fluorescein-labeled siRNA had a higher transfection efficiency than non-fluorescent siNC (A) siGAPDH was used as a positive control (B) p53 mRNA increased after apigenin treatment (20 μM) and decreased following sip53 transfection, but not scrambled sip53 or siNC transfection (C) \*\**P* < 0.01.

### Supplementary Table 1: The oligonucleotides used in this study

| Name <sup>a</sup> | Sequence(5' → 3')      |
|-------------------|------------------------|
| ACTB F            | CACCATGGCAATGAGCGGTTG  |
| ACTB R            | AGGTCTTTGCGGATGTCCACGT |
| GAPDH F           | GTCTCCTCTGACTTCAACAGCG |
| GAPDH R           | ACCACCCTGTTGCTGTAGCCAA |
| TP53 F            | CCTCAGCATCTTATCCGAGTGG |
| TP53 R            | TGGATGGTGGTACAGTCAGAGC |
| siNC-FAM          | UUCUCCGAAGGUGUCACGUTT  |
| siNC              | UUCUCCGAAGGUGUCACGUTT  |
| siGAPDH           | UGACCUCAACUACAUGGUUTT  |
| siP53             | GACUCCAGUGGUAUUCUACTT  |
| Scrambled siRNA   | AGUGUAACGCUACCAUGCUTT  |

<sup>a</sup>F, forward primer; R, reverse primer.
